# Supplementary material for: Glycoprotein 5-Derived Peptides Induce a Protective T-Cell Response in Swine against the Porcine Reproductive and Respiratory Syndrome Virus
Source: MDPI journal article supplement (doi:10.3390/v16010014), 2023-12-21

## SUPPLEMENTARY MATERIAL

Figure S1. Immunization and blood sampling schedule

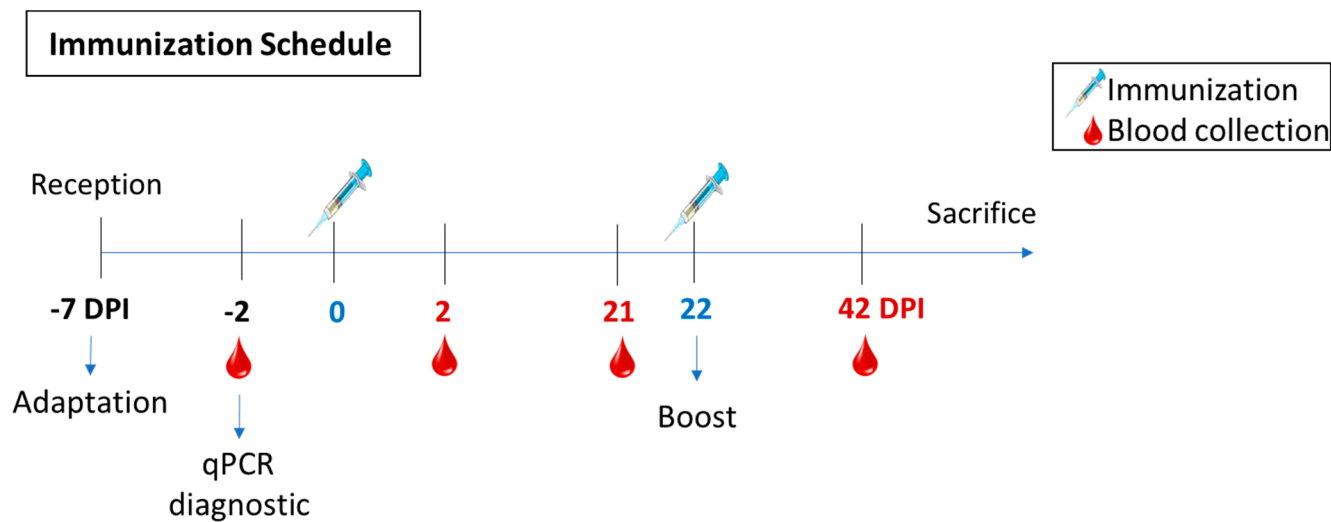

Figure S2. Immunophenotyping CD3<sup>+</sup>/CD8<sup>+</sup> and CD8<sup>+</sup>/CD44<sup>+</sup> cells population from lymphocytes.

Selection of single cells from PBMC

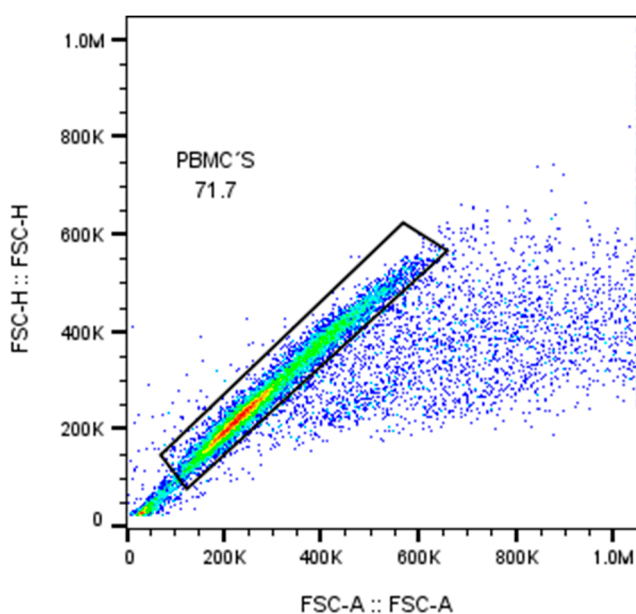

Lymphocyte populations from singlets were separated based on their size and complexity.

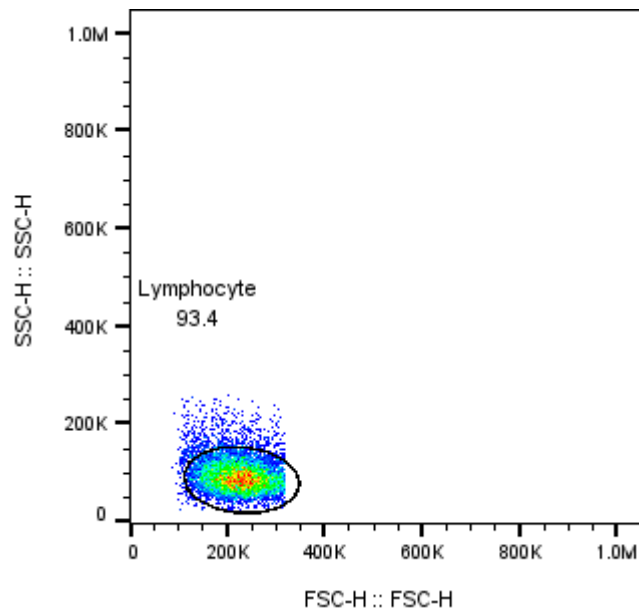

CD3+/CD8+ cells from the total lymphocyte population.

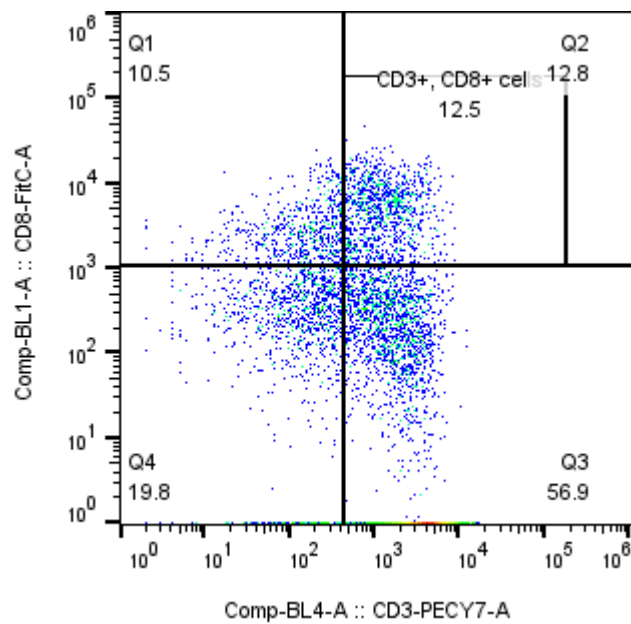

CD8+/CD44+ cells from the total lymphocyte population.

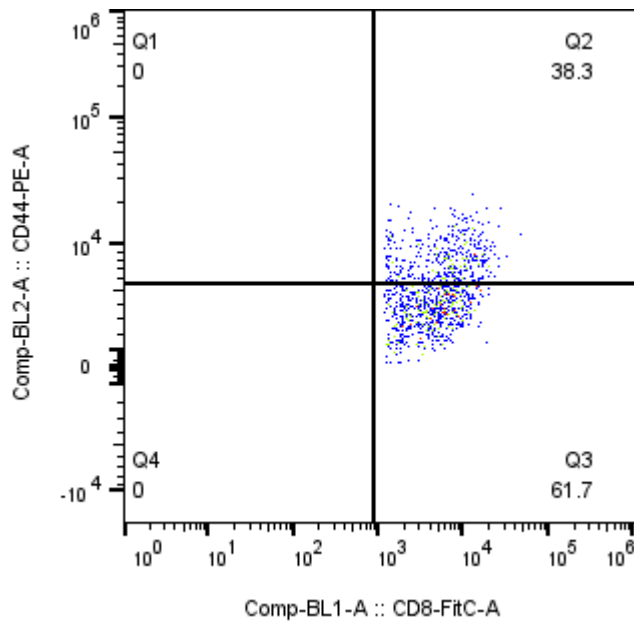

Figure S3. Standard curve for PRRSV quantification.

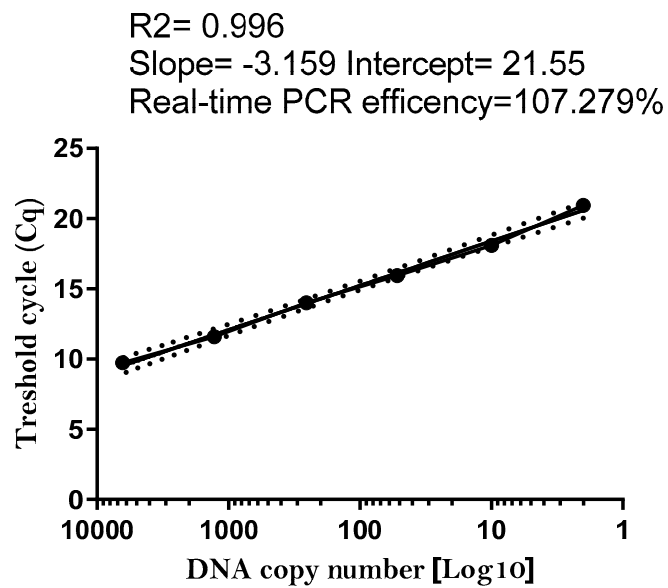

Standard curve for the quantification of viral copy number using qPCR.

We used six-fold dilutions ranging from  $6.4 \times 10^9$  to  $2.0 \times 10^6$  copies, based on Log10 per  $\mu\text{l}$ .

These dilutions were plotted with the dilution factor on the X-axis and the quantification cycle (Cq) values on the Y-axis.

Figure S4. Viability of the lymphocytes after cryopreservation assessed using MTT assay.

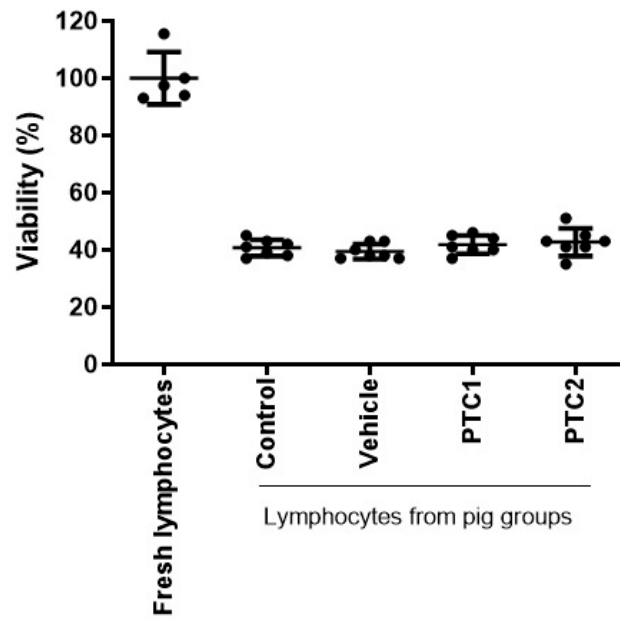

Figure S5. Graphical Representation of qPCR Software Results for the Detection of PRRSV in Experimental Pig Samples.

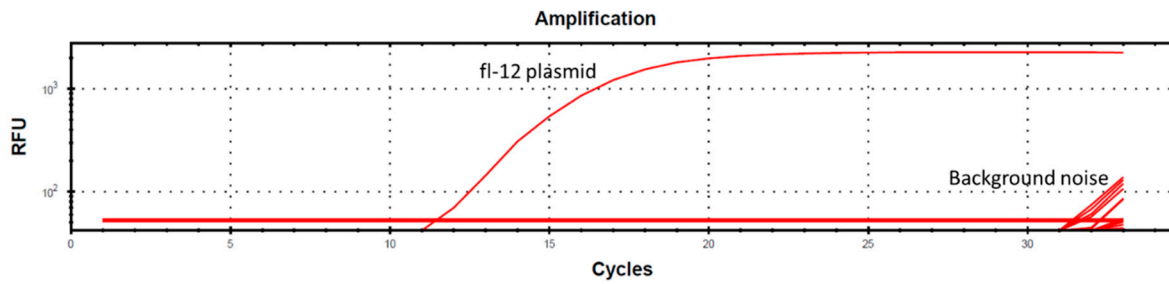

Supplement: s1 [file s1]
